# Supplementary material for: Activation of Slit2/Robo1 Signaling Promotes Tumor Metastasis in Colorectal Carcinoma through Activation of the TGF-β/Smads Pathway
Source: MDPI journal article supplement (doi:10.3390/cells8060635), 2019-06-25
Supplement: s1 [file s1]

## Supplementary Figure Legends

### Supplementary Figure 1

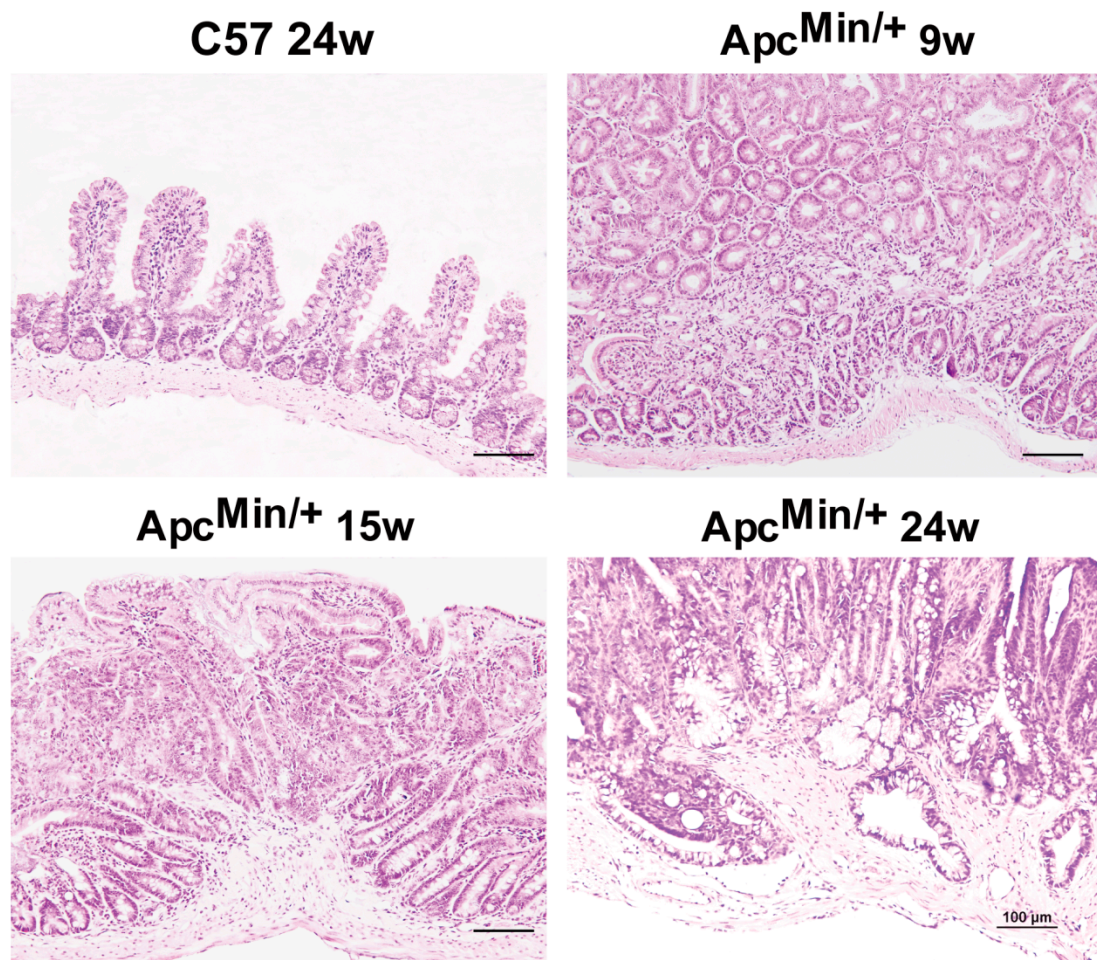

**Supplementary Figure 1. The pathological stages of  $Apc^{Min/+}$  mice.** The pathological process in  $Apc^{Min/+}$  mice was accessed under a microscope through H&E staining. Hyperplasia of the small intestine glands can be seen in most of the small intestines of 9 week old  $Apc^{Min/+}$  mice. In 15 week old  $Apc^{Min/+}$  mice, the basal lamina was intact and the epithelial cells were well differentiated. In addition, Adenoma can be seen in most of the small intestines of 15 week old  $Apc^{Min/+}$  mice. Adenocarcinoma can be seen in most of the small intestines of 24 week old  $Apc^{Min/+}$  mice, and some tumor cells had broken through the basement. Scale Bar: 100  $\mu$ m.

**Supplementary Figure 2**

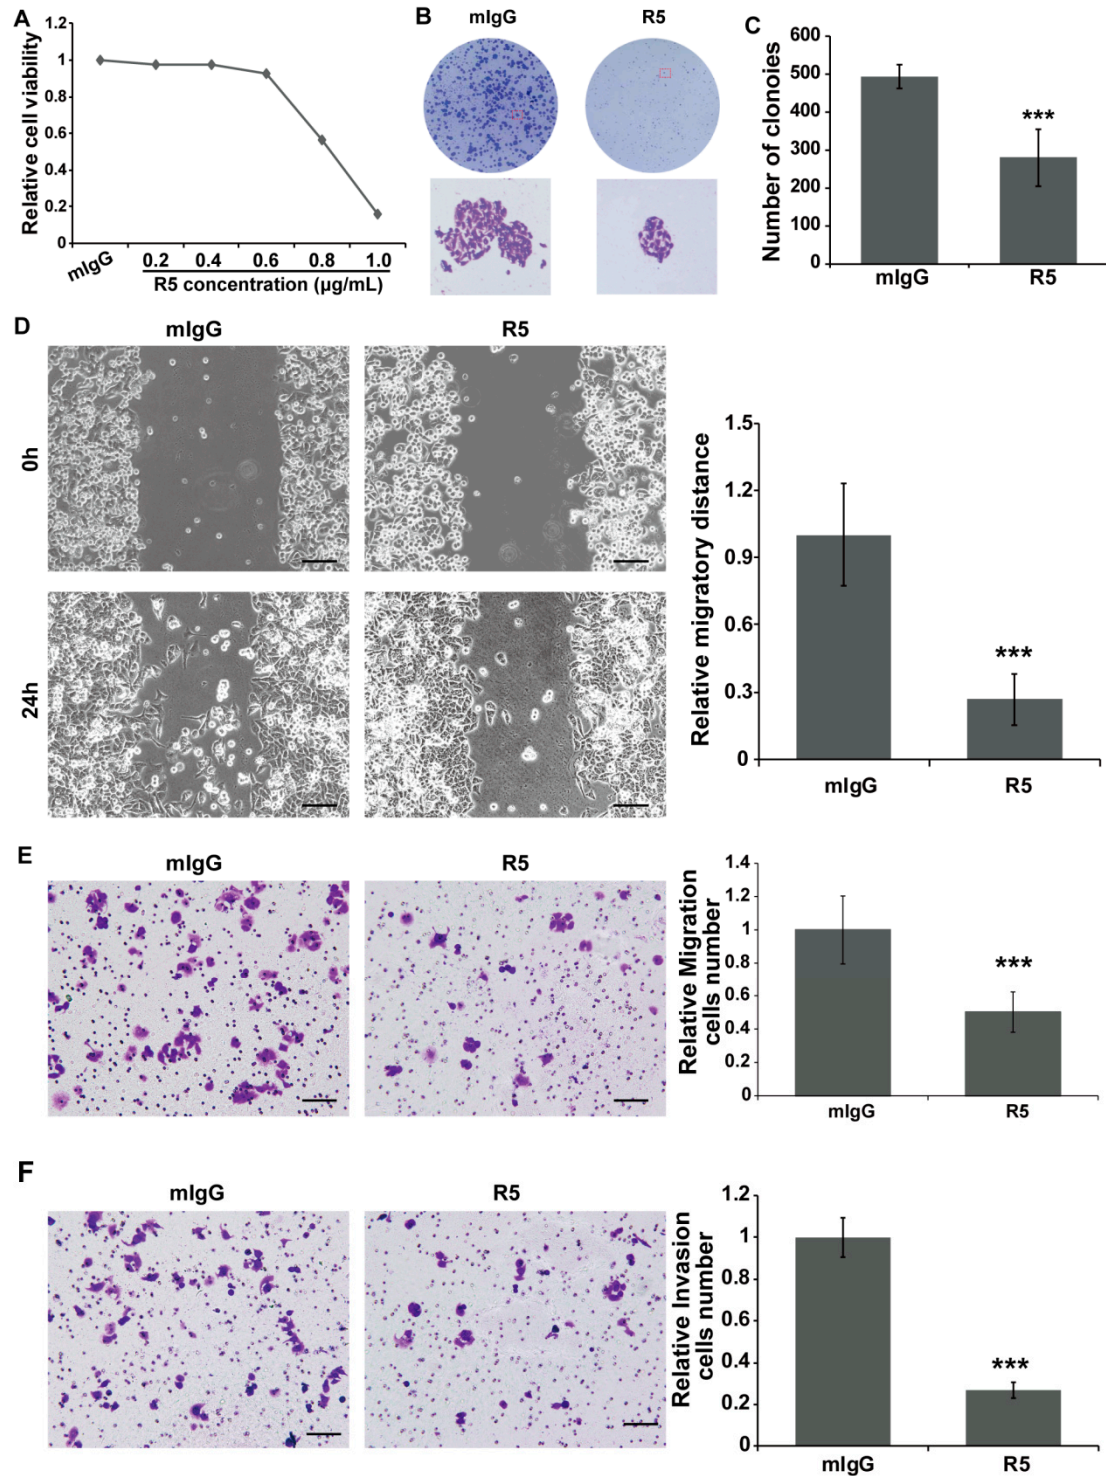

**Supplementary Figure 2.** Blocking of Slit2/Robo1 signaling inhibits cell proliferation, migration, chemotactic and invasion of SW480 cells *in vitro*. (A) SW480 cells were treated with indicated concentration of R5 for 48 h. The cell viability was measured using CCK8 assay. R5 inhibits cell viability in a dose-dependent manner,

and the  $IC_{50}$  is  $\sim 0.8 \mu\text{g/mL}$  in SW480 cells. **(B)** SW480 cells (1000 cell per well) were treated with  $0.8 \mu\text{g/mL}$  of mIgG or R5. The size of colonies was smaller in R5-treated wells compared with mIgG-treated wells. **(C)** The total number of colonies in R5-treated and mIgG-treated wells of SW480 cells were counted, and fewer colonies can be seen in R5-treated wells compared with mIgG-treated wells. The results are representative of three independent experiments. **(D)** The inhibition effect of blocking of Slit2/Robo1 signaling on cell migration was detected using a wound healing assay. SW480 cells were treated with mIgG or R5 at  $0.8 \mu\text{g/mL}$ , and the relative cell migration distance compared with 0 h was detected and statistic at 24 hours later. R5 significantly inhibited cell migration compared with mIgG in SW480 cells. **(E)** The chemotactic ability of SW480 cells that treated with R5 or mIgG was detected using tanswell migration assay. The cells were treated with mIgG or R5 ( $0.8 \mu\text{g/mL}$ ) and the cells migrated to the lower membrane of chamber was detected at 16 h later. The number of migrated cells were decreased by R5 compared with mIgG treated group. **(F)** A Matrigel invasion assay was used to detect the inhibition effect of R5 on cell invasion. SW480 cells were added into the upper chambers and treated with mIgG or R5 at  $0.8 \mu\text{g/mL}$ , and the invasion of the cells to the bottom of the chambers was measured 20 h later. Specific blocking of Slit2/Robo1 signaling using R5 significantly suppresses cell invasion in SW480 cells compared with mIgG. \*\*\* $P < 0.001$ . Scale Bars:  $100 \mu\text{m}$ .



### Supplementary Figure 3

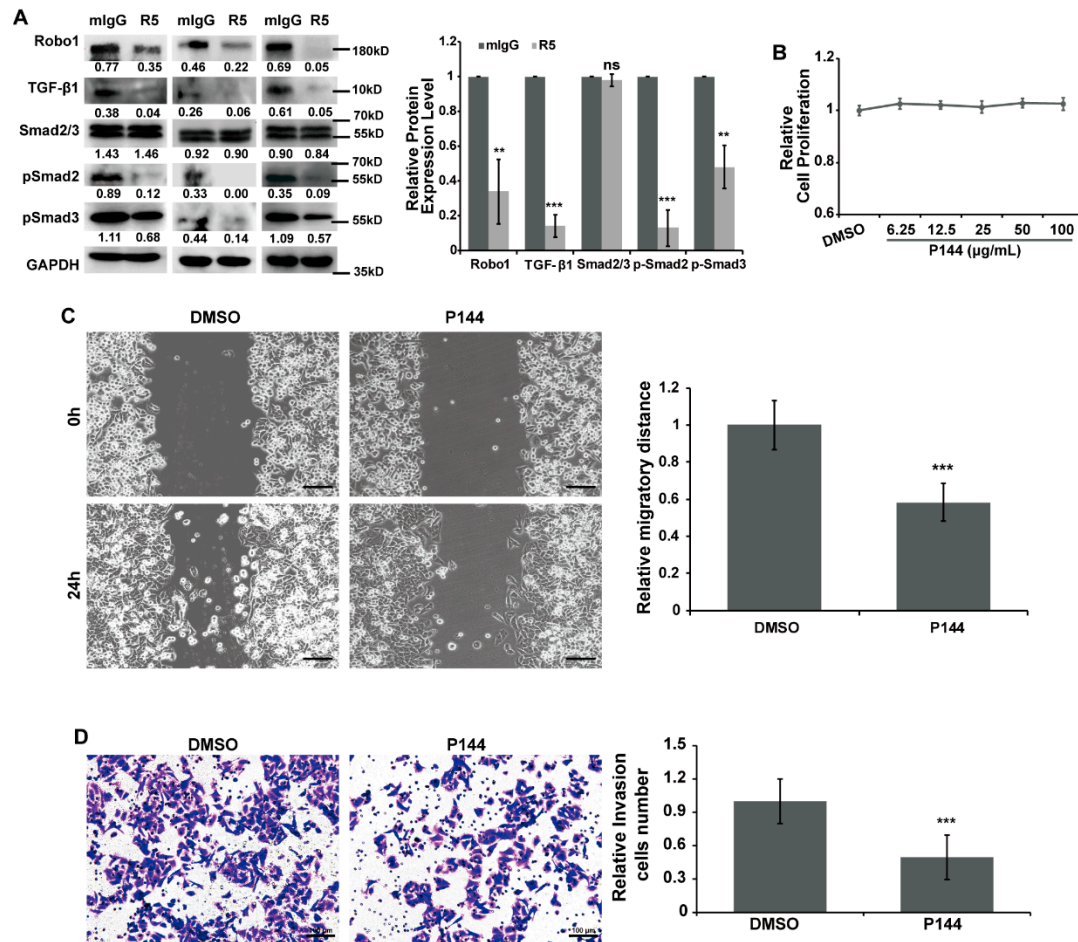

**Supplementary Figure 3.** TGF-β1/Smad2/3 pathway is correlated with Slit2/Robo1 signaling inhibits cell migration and invasion in SW480 cells. (A) Blocking of Slit2/Robo1 signaling using R5 significantly inhibit the expression of TGF-β1 and phosphorylated Smad2/Smad3 in SW480 cells. (B) Cell proliferation was not affected by P144, a TGF-β1 inhibitor, in SW480 cells at 48 h post-treatment. The cell migration and invasion ability of SW480 cells were measured using wound healing assay and Matrigel invasion assay. The cell migration (C) and invasion (D) ability was significantly inhibited by P144 compared with the cells were treated with DMSO in SW480 cells. ns: no significantly difference, \*\*:  $P < 0.05$ , \*\*\*:  $P < 0.001$ . The protein bands were quantified densitometrical and normalized to GAPDH expression. Scale Bars: 100 μm.



## Supplementary Figure 4

A. The uncut gels of western blot for three replicates in figure 4D.

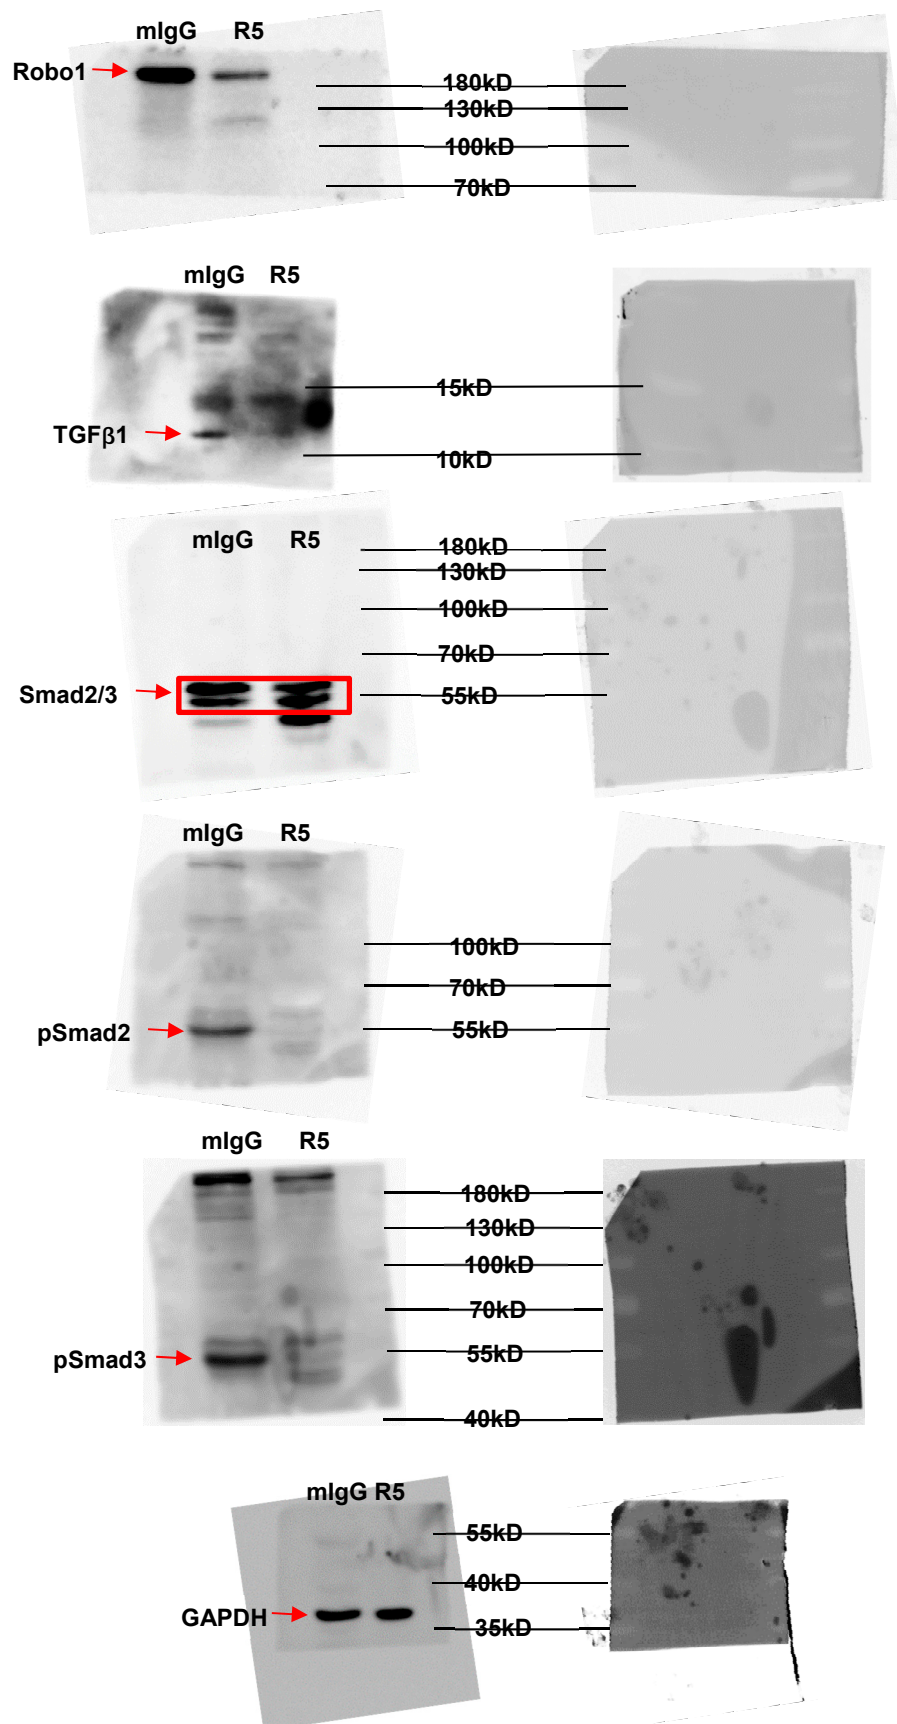

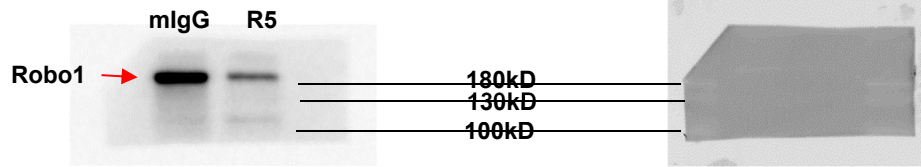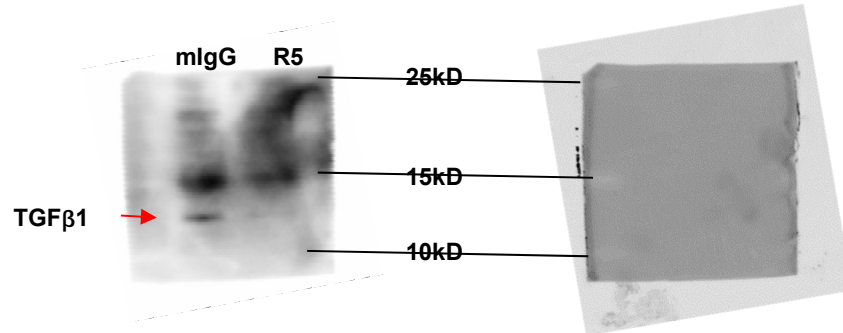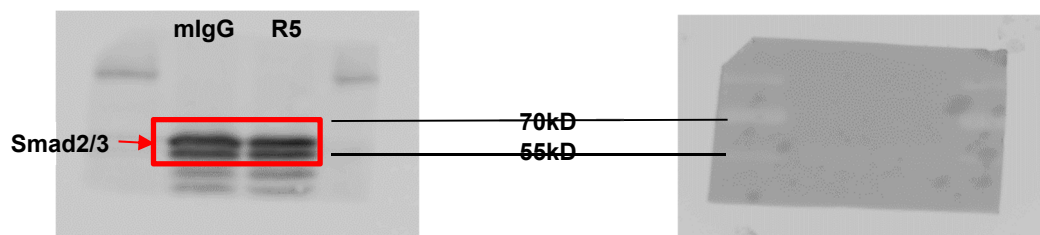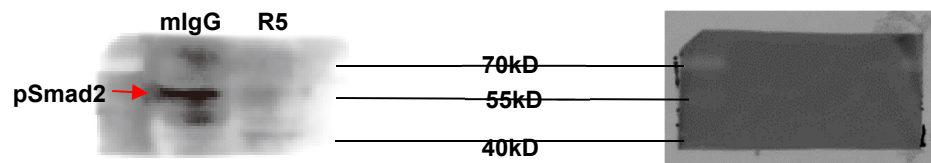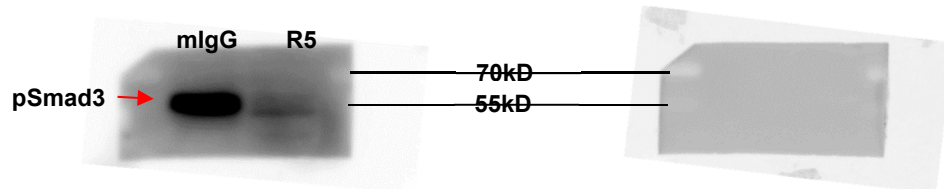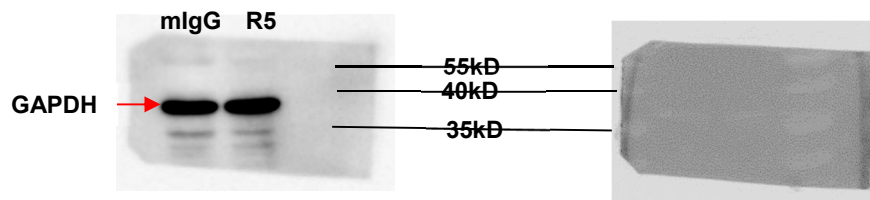

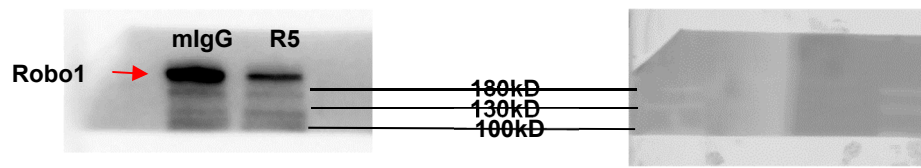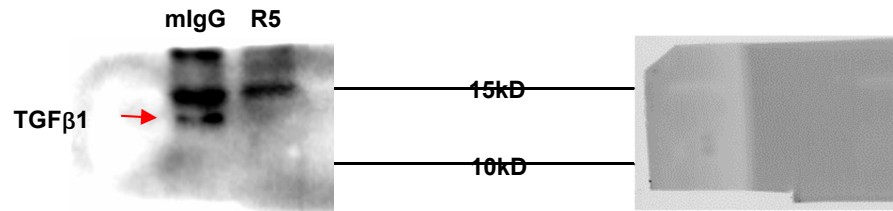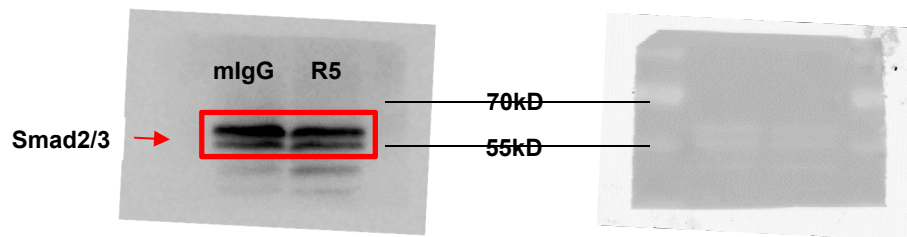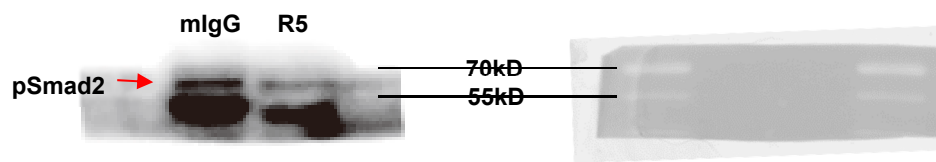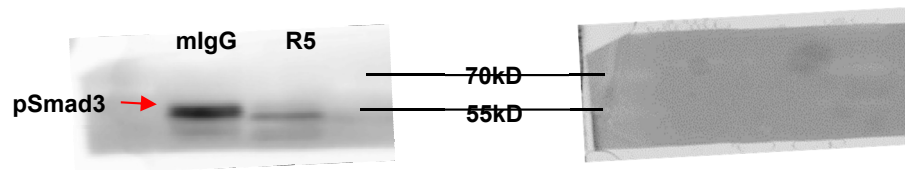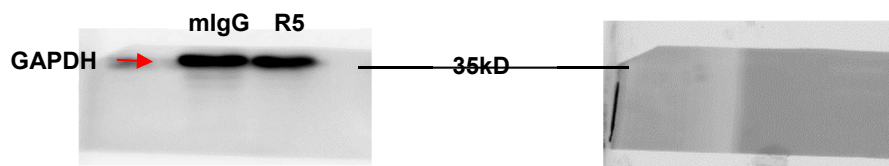



**B. The uncut gels of western blot for three replicates in Supplementary figure 3A.**

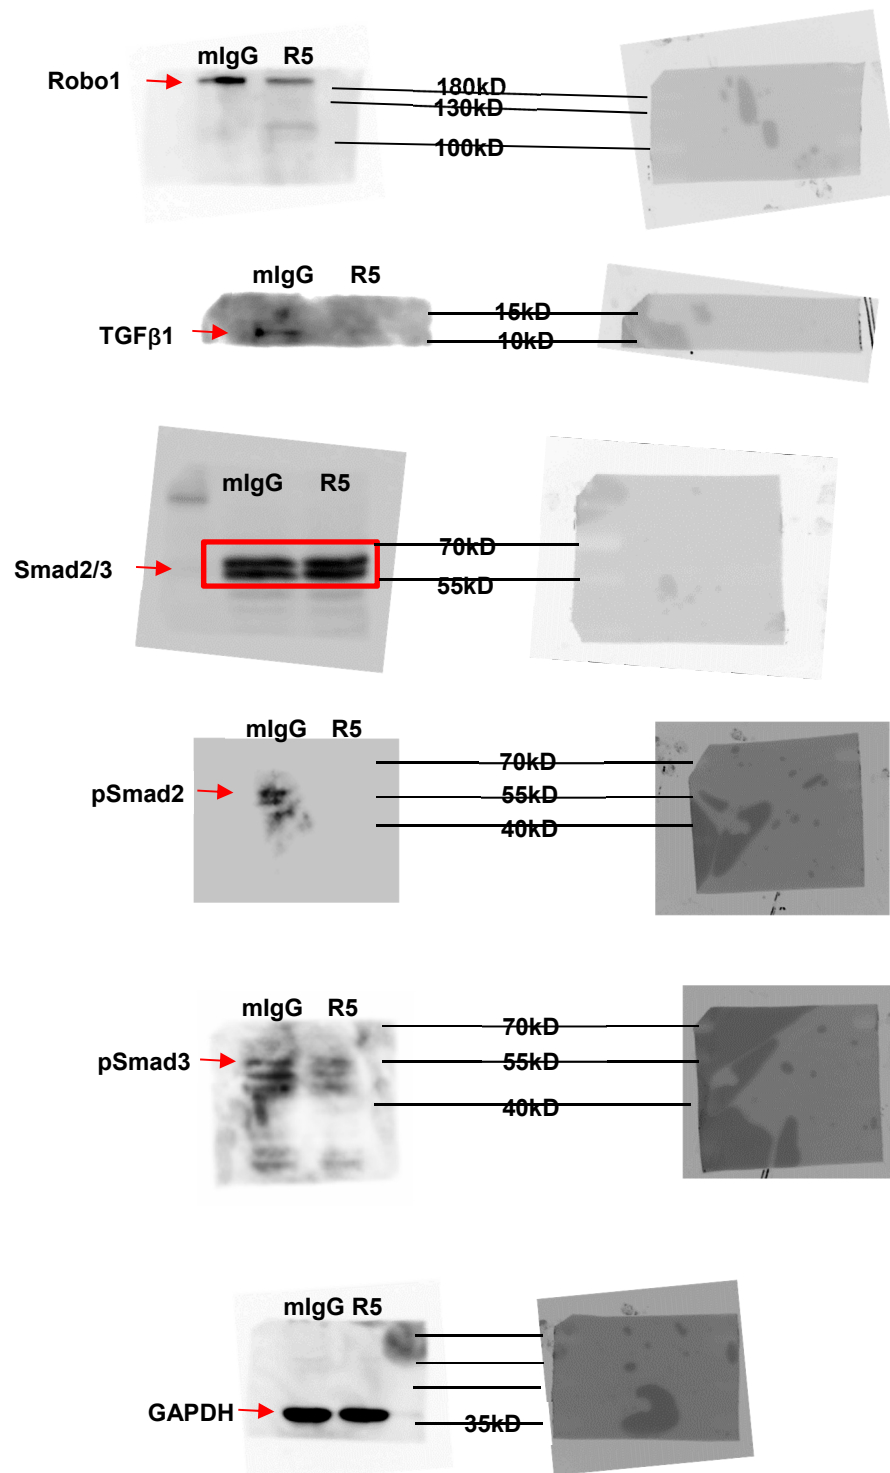

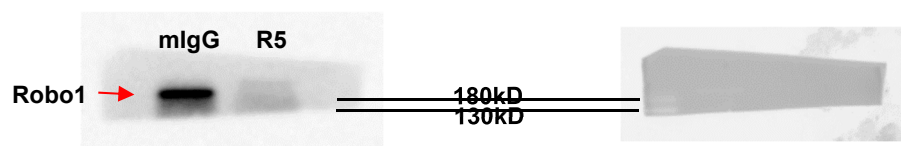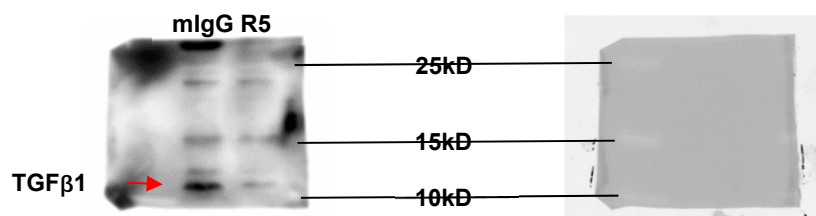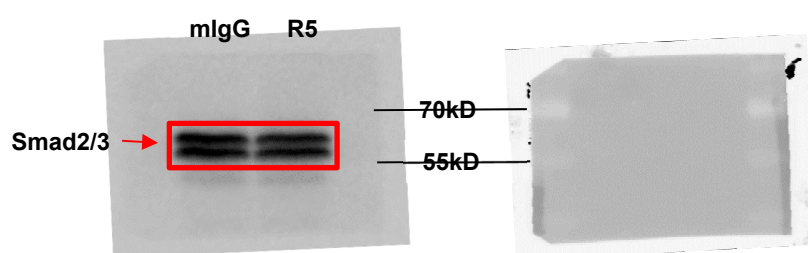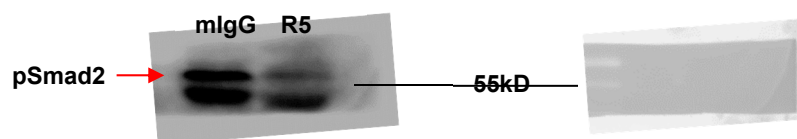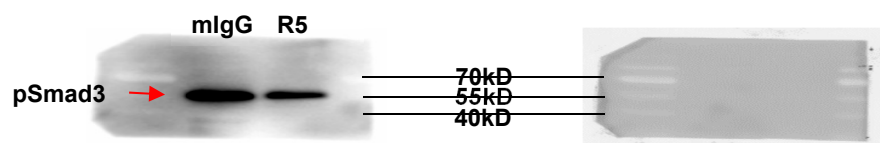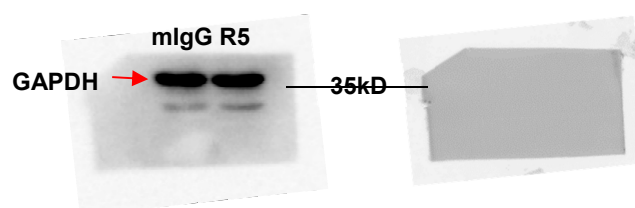

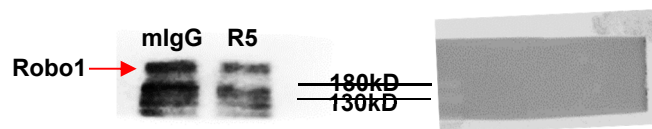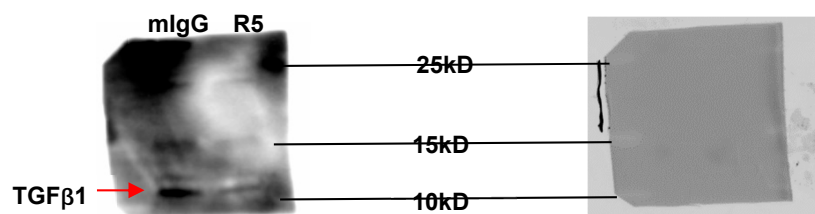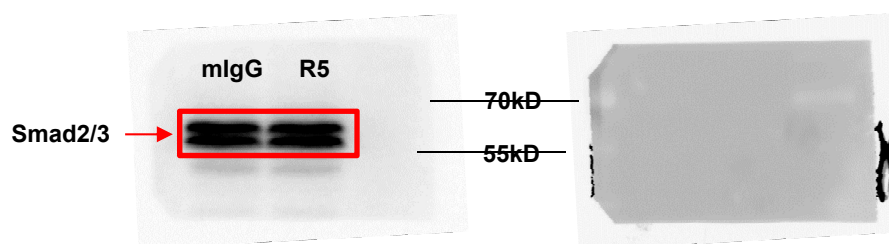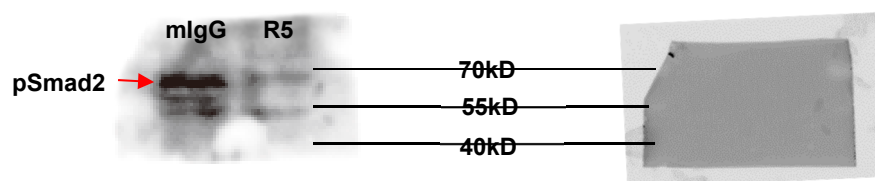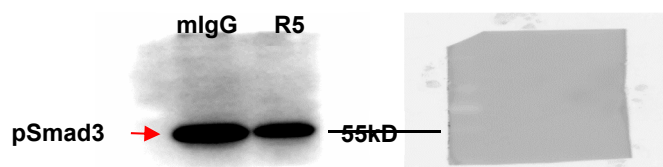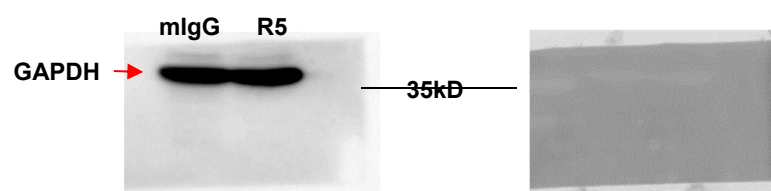



C. The uncut gels of western blot for two replicates in figure 5D.

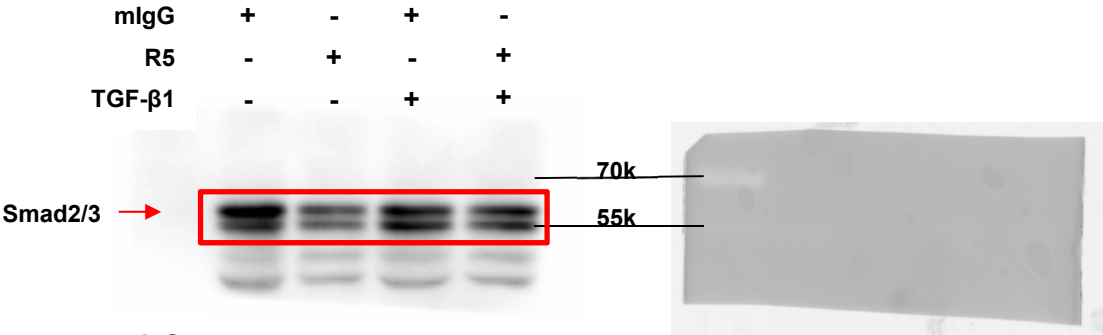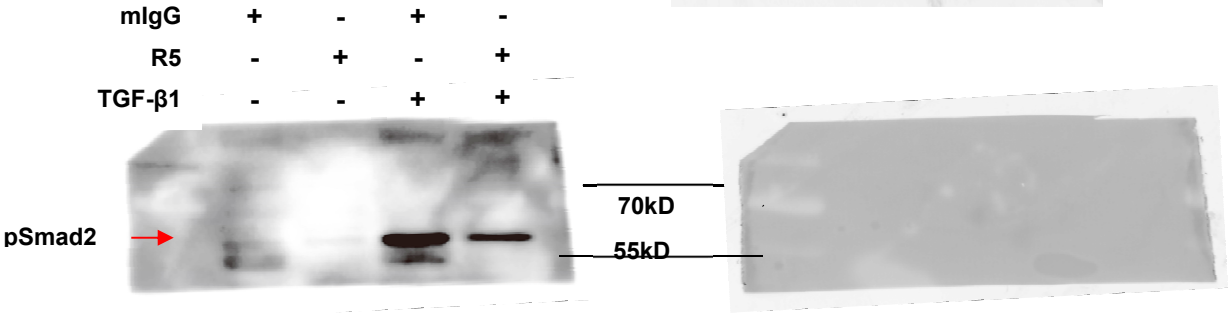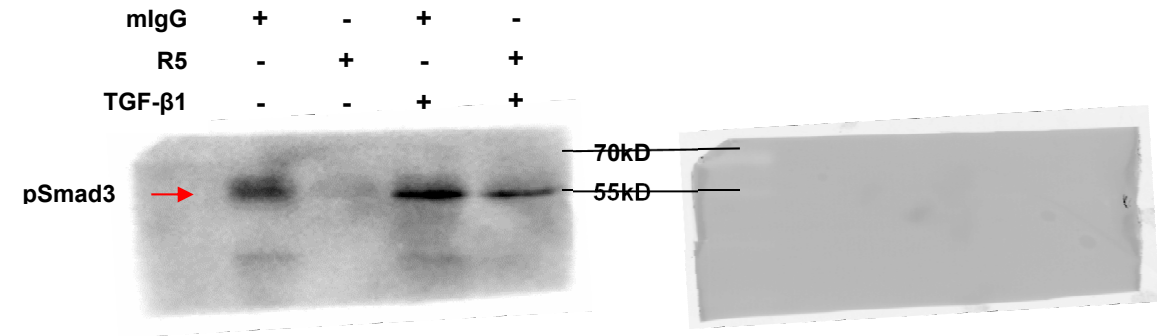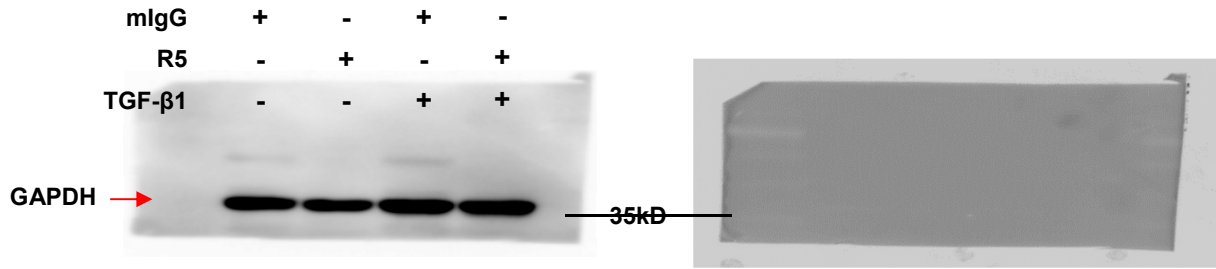

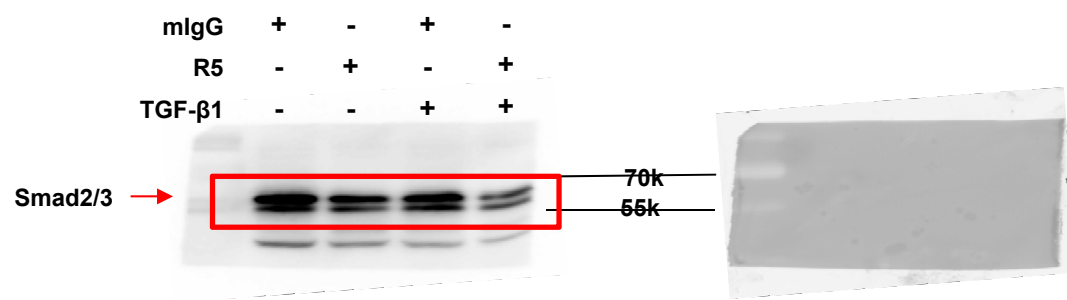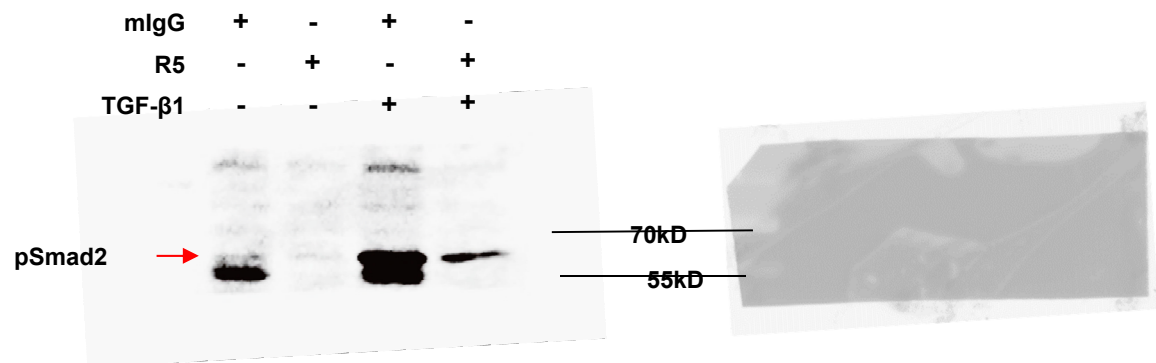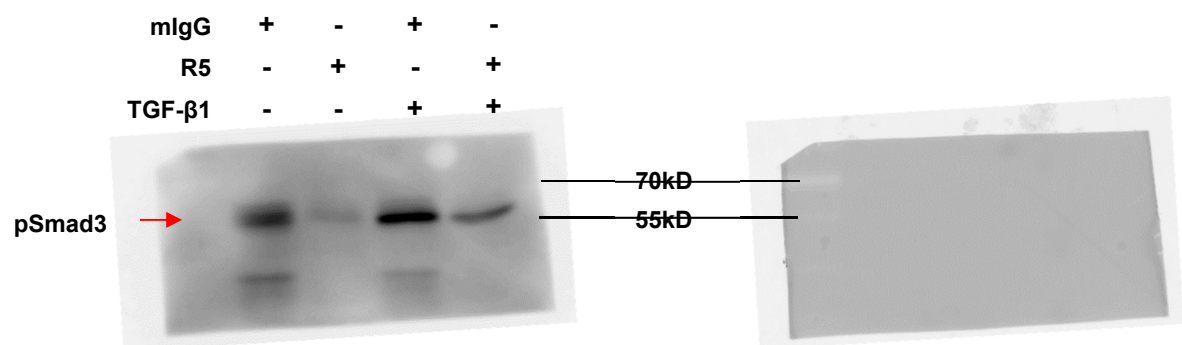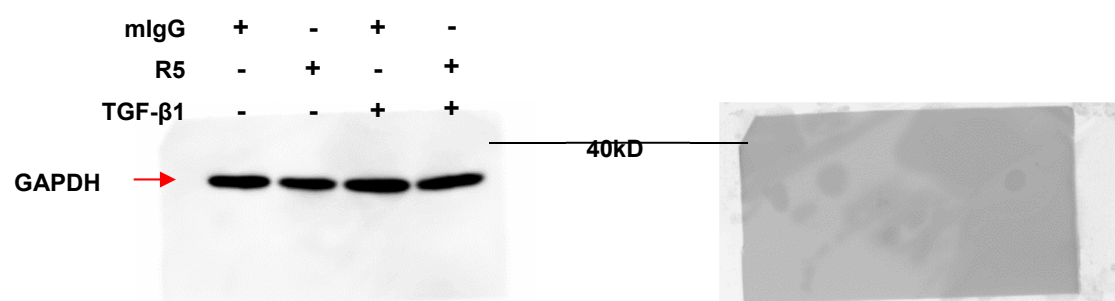

Supplementary Table 1. The data of tumor number and tumor burden of Apc<sup>Min/+</sup> mice that treated with mIgG or R5.

| Mouse<br>number | Tumor number |    |         |    |       |    | Tumor burden |           |           |           |           |           |
|-----------------|--------------|----|---------|----|-------|----|--------------|-----------|-----------|-----------|-----------|-----------|
|                 | microadenoma |    | adenoma |    | total |    | microadenoma |           | adenoma   |           | total     |           |
|                 | mIgG         | R5 | mIgG    | R5 | mIgG  | R5 | mIgG         | R5        | mIgG      | R5        | mIgG      | R5        |
| 1               | 24           | 13 | 2       | 1  | 26    | 14 | 35.467880    | 11.616490 | 29.121180 | 8.588305  | 64.589060 | 20.204800 |
| 2               | 25           | 15 | 3       | 1  | 28    | 16 | 34.839840    | 20.490440 | 26.554390 | 9.849745  | 61.394230 | 30.340180 |
| 3               | 25           | 9  | 3       | 1  | 28    | 10 | 30.846410    | 7.981195  | 36.244480 | 14.219480 | 67.090900 | 22.200680 |
| 4               | 28           | 15 | 4       | 3  | 32    | 18 | 34.017850    | 15.428870 | 34.985680 | 24.309180 | 69.003520 | 39.738050 |
| 5               | 27           | 27 | 2       | 3  | 29    | 30 | 28.956180    | 18.373220 | 17.166700 | 49.572060 | 46.122880 | 67.945280 |
